# Supplementary material for: The use of audio self-hypnosis to promote weight loss using the transtheoretical model of change: a randomized clinical pilot trial
Source: PeerJ journal article supplement (doi:10.7717/peerj.14422), 2022-12-14
Supplement: COnsort_checklist.pdf [file COnsort_checklist.pdf]

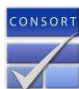

## CONSORT 2010 checklist of information to include when reporting a randomised trial\*

| Section/Topic                    | Item No | Checklist item                                                                                                                                                                              | Reported on page No                                          |
|----------------------------------|---------|---------------------------------------------------------------------------------------------------------------------------------------------------------------------------------------------|--------------------------------------------------------------|
| <b>Title and abstract</b>        |         |                                                                                                                                                                                             |                                                              |
|                                  | 1a      | Identification as a randomised trial in the title                                                                                                                                           | <a href="#">Lines 1-3</a>                                    |
|                                  | 1b      | Structured summary of trial design, methods, results, and conclusions (for specific guidance see CONSORT for abstracts)                                                                     | <a href="#">Lines 21-33</a>                                  |
| <b>Introduction</b>              |         |                                                                                                                                                                                             |                                                              |
| Background and objectives        | 2a      | Scientific background and explanation of rationale                                                                                                                                          | <a href="#">Lines 43-45;</a><br><a href="#">58-59; 71-75</a> |
|                                  | 2b      | Specific objectives or hypotheses                                                                                                                                                           | <a href="#">Lines 79-82</a>                                  |
| <b>Methods</b>                   |         |                                                                                                                                                                                             |                                                              |
| Trial design                     | 3a      | Description of trial design (such as parallel, factorial) including allocation ratio                                                                                                        | <a href="#">Line 85</a> ; 136                                |
|                                  | 3b      | Important changes to methods after trial commencement (such as eligibility criteria), with reasons                                                                                          | <a href="#">Not applicable</a>                               |
| Participants                     | 4a      | Eligibility criteria for participants                                                                                                                                                       | <a href="#">Lines 101-108</a>                                |
|                                  | 4b      | Settings and locations where the data were collected                                                                                                                                        | <a href="#">Lines 94-99</a>                                  |
| Interventions                    | 5       | The interventions for each group with sufficient details to allow replication, including how and when they were actually administered                                                       | <a href="#">Lines 86-90</a>                                  |
| Outcomes                         | 6a      | Completely defined pre-specified primary and secondary outcome measures, including how and when they were assessed                                                                          | <a href="#">Lines 110-120;</a><br><a href="#">161-168</a>    |
|                                  | 6b      | Any changes to trial outcomes after the trial commenced, with reasons                                                                                                                       | <a href="#">Not applicable</a>                               |
| Sample size                      | 7a      | How sample size was determined                                                                                                                                                              | <a href="#">Lines 150-159</a>                                |
|                                  | 7b      | When applicable, explanation of any interim analyses and stopping guidelines                                                                                                                |                                                              |
| Randomisation:                   |         |                                                                                                                                                                                             |                                                              |
| Sequence generation              | 8a      | Method used to generate the random allocation sequence                                                                                                                                      | <a href="#">Lines 137-139</a>                                |
|                                  | 8b      | Type of randomisation; details of any restriction (such as blocking and block size)                                                                                                         | <a href="#">Lines 137</a>                                    |
| Allocation concealment mechanism | 9       | Mechanism used to implement the random allocation sequence (such as sequentially numbered containers), describing any steps taken to conceal the sequence until interventions were assigned | <a href="#">Lines 138-140</a>                                |
|                                  | 10      | Who generated the random allocation sequence, who enrolled participants, and who assigned participants to interventions                                                                     | <a href="#">Lines 138-140</a>                                |
| Blinding                         | 11a     | If done, who was blinded after assignment to interventions (for example, participants, care providers, those                                                                                | <a href="#">Lines 141</a>                                    |

|                                                      |     |                                                                                                                                                   |                                                 |
|------------------------------------------------------|-----|---------------------------------------------------------------------------------------------------------------------------------------------------|-------------------------------------------------|
|                                                      |     | assessing outcomes) and how                                                                                                                       |                                                 |
|                                                      | 11b | If relevant, description of the similarity of interventions                                                                                       |                                                 |
| Statistical methods                                  | 12a | Statistical methods used to compare groups for primary and secondary outcomes                                                                     | <a href="#">Lines 163-168</a>                   |
|                                                      | 12b | Methods for additional analyses, such as subgroup analyses and adjusted analyses                                                                  | <a href="#">Not applicable</a>                  |
| <b>Results</b>                                       |     |                                                                                                                                                   |                                                 |
| Participant flow (a diagram is strongly recommended) | 13a | For each group, the numbers of participants who were randomly assigned, received intended treatment, and were analysed for the primary outcome    | <a href="#">Lines 171-177</a>                   |
|                                                      | 13b | For each group, losses and exclusions after randomisation, together with reasons                                                                  | <a href="#">Lines 171-177</a>                   |
| Recruitment                                          | 14a | Dates defining the periods of recruitment and follow-up                                                                                           | <a href="#">Lines 171-173</a>                   |
|                                                      | 14b | Why the trial ended or was stopped                                                                                                                | <a href="#">not applicable</a>                  |
| Baseline data                                        | 15  | A table showing baseline demographic and clinical characteristics for each group                                                                  | <a href="#">Lines 174</a>                       |
| Numbers analysed                                     | 16  | For each group, number of participants (denominator) included in each analysis and whether the analysis was by original assigned groups           | <a href="#">Figure 1</a>                        |
| Outcomes and estimation                              | 17a | For each primary and secondary outcome, results for each group, and the estimated effect size and its precision (such as 95% confidence interval) | <a href="#">Lines 178-182</a>                   |
|                                                      | 17b | For binary outcomes, presentation of both absolute and relative effect sizes is recommended                                                       |                                                 |
| Ancillary analyses                                   | 18  | Results of any other analyses performed, including subgroup analyses and adjusted analyses, distinguishing pre-specified from exploratory         | <a href="#">Lines 179-180</a>                   |
| Harms                                                | 19  | All important harms or unintended effects in each group (for specific guidance see CONSORT for harms)                                             |                                                 |
| <b>Discussion</b>                                    |     |                                                                                                                                                   |                                                 |
| Limitations                                          | 20  | Trial limitations, addressing sources of potential bias, imprecision, and, if relevant, multiplicity of analyses                                  | <a href="#">Lines 215-221</a>                   |
| Generalisability                                     | 21  | Generalisability (external validity, applicability) of the trial findings                                                                         | <a href="#">Lines 215-221</a>                   |
| Interpretation                                       | 22  | Interpretation consistent with results, balancing benefits and harms, and considering other relevant evidence                                     | <a href="#">Lines 203-210</a>                   |
| <b>Other information</b>                             |     |                                                                                                                                                   |                                                 |
| Registration                                         | 23  | Registration number and name of trial registry                                                                                                    | <a href="#">Line 33</a> <a href="#">Line 35</a> |
| Protocol                                             | 24  | Where the full trial protocol can be accessed, if available                                                                                       |                                                 |
| Funding                                              | 25  | Sources of funding and other support (such as supply of drugs), role of funders                                                                   | <a href="#">Line 35</a>                         |

\*We strongly recommend reading this statement in conjunction with the CONSORT 2010 Explanation and Elaboration for important clarifications on all the items. If relevant, we also recommend reading CONSORT extensions for cluster randomised trials, non-inferiority and equivalence trials, non-pharmacological treatments, herbal interventions, and pragmatic trials. Additional extensions are forthcoming: for those and for up to date references relevant to this checklist, see [www.consort-statement.org](http://www.consort-statement.org).
